# Supplementary material
Source: PubMed Central journal article supplement (PMC5759816)
Supplement: supp_the2016-0025_onco12254-sup-0001-suppinfo01.pdf [file supp_the2016-0025_onco12254-sup-0001-suppinfo01.pdf]

Supplemental Table for:  
 Immunotherapy: A New (and Old) Approach to Treatment of Soft Tissue and Bone Sarcomas  
 Michael J. Nathenson et al.

**Table S1.** Characteristic chromosomal abnormalities and genetic alternations associated with soft tissue and bone sarcomas

| Type of soft tissue or bone sarcoma                                   | Chromosomal abnormality or genetic alteration | Gene or gene fusion |
|-----------------------------------------------------------------------|-----------------------------------------------|---------------------|
| Ewing's/primitive neuroectodermal tumor (PNET)                        | t(11;22)(q24;q12)                             | EWS1-FLI1           |
|                                                                       | t(21;22)(q22;q12)                             | EWS1-ERG            |
|                                                                       | t(2;22)(q33;q12)                              | EWSR1-FEV           |
|                                                                       | t(7;22)(p22;q12)                              | EWSR1-ETV1          |
|                                                                       | t(17;22)(q12;q12)                             | EWSR1-E1AF          |
|                                                                       | Inv(22)(q12;q12)                              | EWSR1-ZSG           |
|                                                                       | t(16;21)(p11;q22)                             | FUS-ERG             |
| Desmoplastic small round cell tumor                                   | t(2;16)(q33;p11)                              | FUS-FEV             |
|                                                                       | t(11;22)(p13;q12)                             | EWSR1-WT1           |
| Alveolar rhabdomyosarcoma                                             | t(2;13)(q35;q14)                              | PAX3-FOXO1          |
|                                                                       | t(1;13)(q36;q14)                              | PAX7-FOXO1          |
|                                                                       | t(X;2)(q13;p11)                               | PAX3-AFX            |
| Myxoid/round cell liposarcoma                                         | t(12;16)(q13;p11)                             | FUS-DD1T3           |
|                                                                       | t(12;22)(q13;q12)                             | EWSR1-DD1T3         |
| Alveolar soft part sarcoma                                            | der(17)t(X;17)(p11.2;q25)                     | ASPL-TFE3           |
| Angiomatoid fibrous histiocytoma                                      | t(12;22)(q13;q12)                             | EWSR1-ATF1          |
|                                                                       | t(2;22)(q33;q12)                              | EWSR1-CREB1         |
|                                                                       | t(12;16)(q13;p11)                             | FUS-ATF1            |
| Clear cell sarcoma                                                    | t(12;22)(q13;q12)                             | EWSR1-ATF1          |
|                                                                       | t(2;22)(q33;q12)                              | EWSR1-CREB1         |
| Congenital fibrosarcoma                                               | t(12;15)(p13;q25)                             | ETV6-NTRK3          |
| Myxoid chondrosarcoma                                                 | t(9;22)(q22;q12)                              | EWSR1-NR4A3         |
|                                                                       | t(9;17)(q22;q11)                              | TAF2N-NR4A3         |
|                                                                       | t(9;15)(q22;q21)                              | TCF12-NR4A3         |
|                                                                       | t(3;9)(q11;q22)                               | TGF-NR4A3           |
| Inflammatory myofibroblastic tumor                                    | t(1;2)(q22;p23)                               | TPM3-ALK            |
|                                                                       | t(2;19)(p23;p13)                              | TPM4-ALK            |
|                                                                       | t(2;17)(p23;q23)                              | CLTC-ALK            |
|                                                                       | t(2;2)(p23;q13)                               | RANBP2-ALK          |
|                                                                       | t(2;11)(p23;p15)                              | CARS-ALK            |
|                                                                       | inv(2)(p23;q35)                               | ATIC-ALK            |
| Low-grade fibromyxoid sarcoma                                         | t(7;16)(q33;p11)                              | FUS-CREB3L2         |
|                                                                       | t(11;16)(p11;p11)                             | FUS-CREB3L1         |
| Synovial sarcoma                                                      | t(X;18)(p11;q11)                              | SS18-SSX(1, 2, 4)   |
| Tenosynovial giant cell tumor/pigmented villonodular synovitis (PVNS) | t(1;2)(p13;q35)                               | CSF-1               |
| Dermatofibrosarcoma                                                   | t(17;22)(q21;q13)                             | COL1A1-PDGRB        |
| Epithelioid hemangioendothelioma                                      | t(1;13)(p36;q25)                              | WWTR1-CAMTA1        |
| Mesenchymal chondrosarcoma                                            | --                                            | HEY1-NCOA2          |

Supplemental Table for:  
Immunotherapy: A New (and Old) Approach to Treatment of Soft Tissue and Bone Sarcomas  
Michael J. Nathenson et al.

|                                                                                         |                      |                             |
|-----------------------------------------------------------------------------------------|----------------------|-----------------------------|
| Endometrial stromal tumor                                                               | --                   | JAZF1-SUZ12                 |
|                                                                                         | --                   | YWHAE-FAM22                 |
| Atypical lipomatous tumor/well differentiated liposarcoma, dedifferentiated liposarcoma | Amp 12q14-15         | CDk4, MDM2, SAS, GL1, HMGA2 |
| Epithelioid sarcoma                                                                     | Inactivation of INI1 | INI1                        |
| Extrarenal rhabdoid tumor                                                               | Inactivation of INI1 | INI1                        |
| Desmoid fibromatosis                                                                    | Trisomy 8, 29, -5q21 | CTNNB1 or APC mutations     |
| Sporadic, familial GIST                                                                 | Activating mutations | CKIT and PDGFR              |

This table shows known recurrent chromosomal alterations, including translocations (t), inversions (inv), polyploidy, and complex rearrangements (der), and genetic alterations including gene amplification (amp), gene inactivation, and activating mutations by specific soft tissue or bone sarcoma subtype, with the corresponding involved gene. Obtained from multiple sources [57, 109, 117, 143-152].
